# Supplementary material for: Chemical, Thermal, and Mechanical Properties of Sulfur Polymer Composites Comprising Low-Value Fats and Pozzolan Additives
Source: MDPI journal article supplement (doi:10.3390/chemistry5040146), 2023-10-12
Supplement: s1 [file s1]

Electronic Supplementary Information for:

# **Chemical, Thermal, and Mechanical Properties of Sulfur Polymer Composites Comprising Low-Value Fats and Pozzolan Additives**

**Claudia V. Lopez <sup>1</sup>, Katelyn M. Derr <sup>1</sup>, Ashlyn D. Smith <sup>1</sup>, Andrew G. Tennyson <sup>1,2,\*</sup> and Rhett C. Smith <sup>1,\*</sup>**

<sup>1</sup> Center for Optical Materials Science and Engineering Technology, Department of Chemistry, Clemson University, Clemson, SC 29634, USA

<sup>2</sup> Department Materials Science and Engineering, Clemson University, Clemson, SC 29634, USA

\* Correspondence: atennys@clemson.edu (A.G.T.); rhett@clemson.edu (R.C.S.)

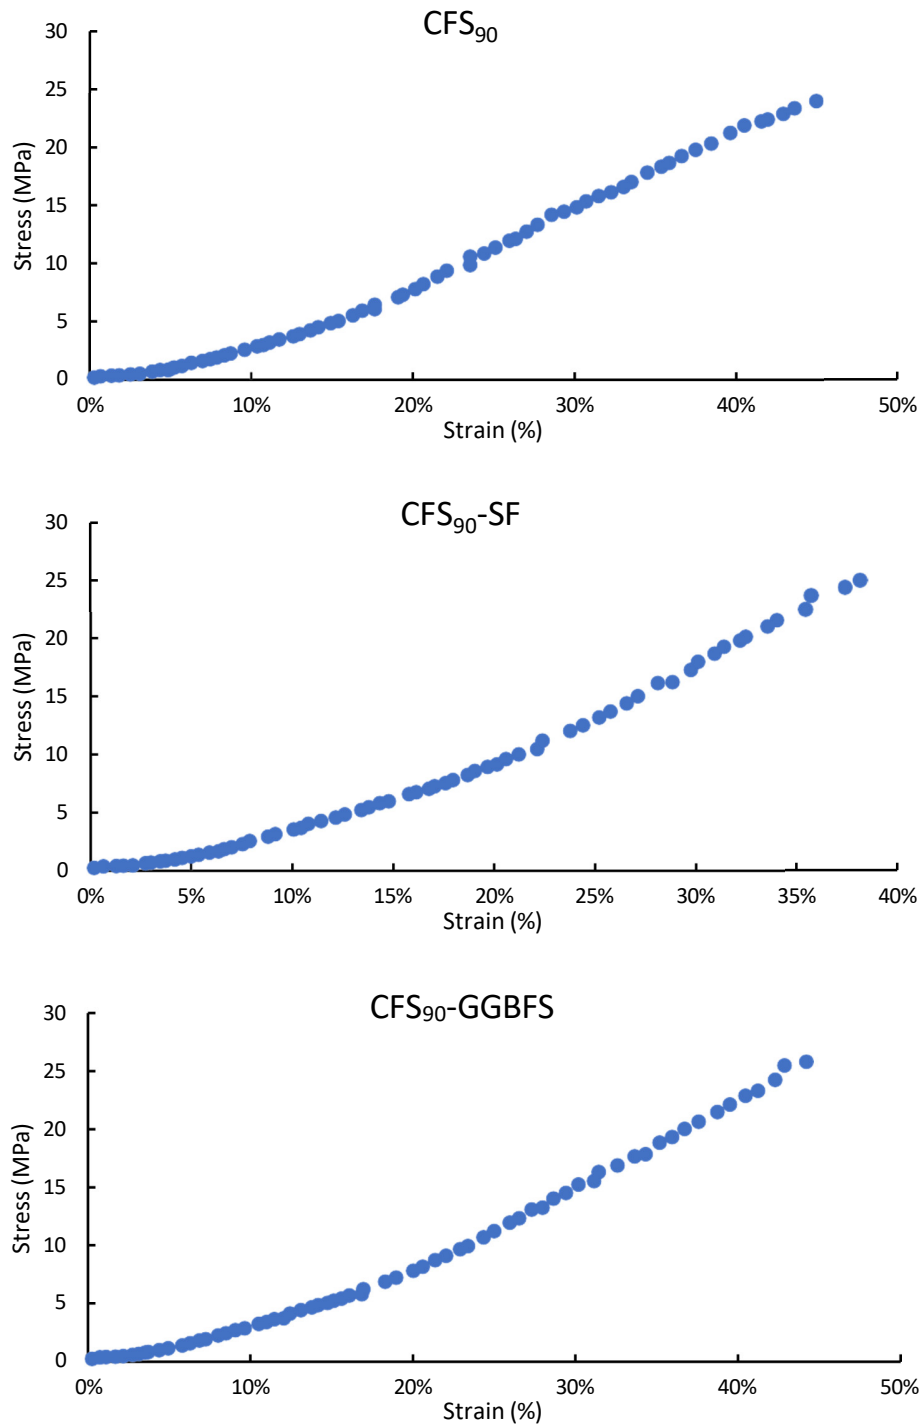

**Figure S1.** Stress-strain plots for measurements on the compression test cylinders for **CFS<sub>90</sub>**, **CFS<sub>90</sub>-SF** and **CFS<sub>90</sub>-GGBFS**. Data in Table 1 are averages of three independent trials with errors reported as standard deviations.

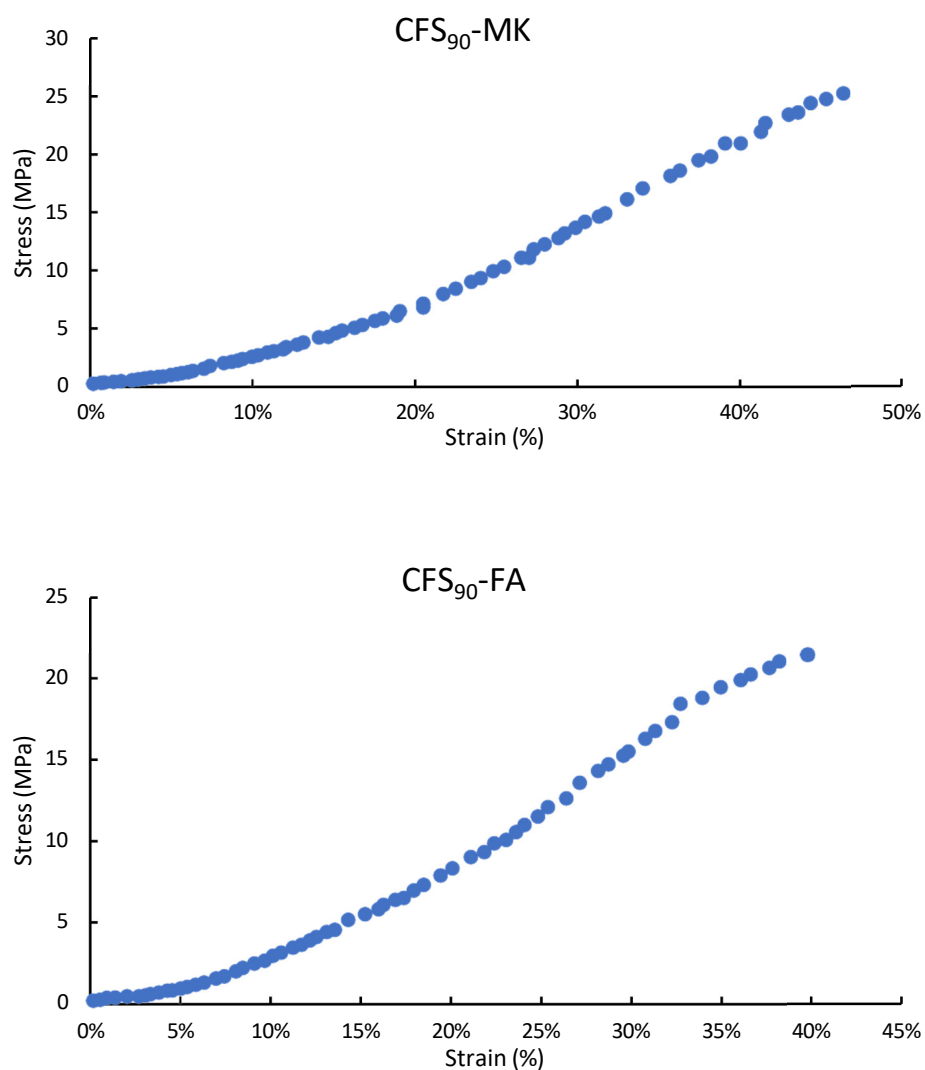

**Figure S2.** Stress-strain plots for measurements on the compression test cylinders for **CFS<sub>90</sub>-MK** and **CFS<sub>90</sub>-FA**. Data in Table 1 are averages of three independent trials with errors reported as standard deviations.

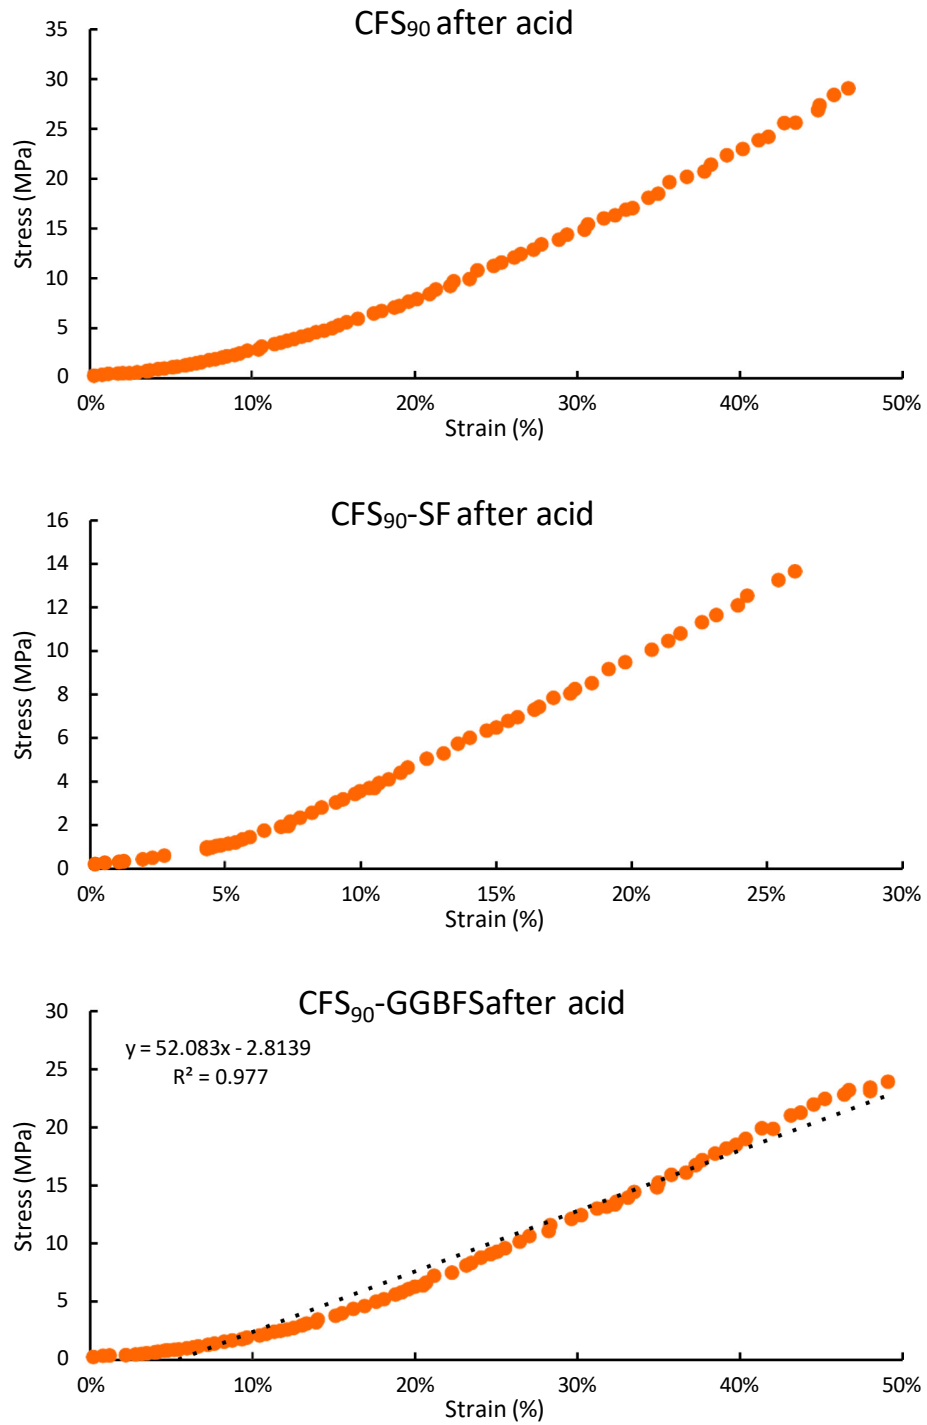

**Figure S3.** Stress-strain plots for measurements on the compression test cylinders for **CFS<sub>90</sub>**, **CFS<sub>90</sub>-SF** and **CFS<sub>90</sub>-GGBFS** after being submerged in 0.5 M H<sub>2</sub>SO<sub>4</sub> for 24 h. Data in Table 1 are averages of three independent trials with errors reported as standard deviations.

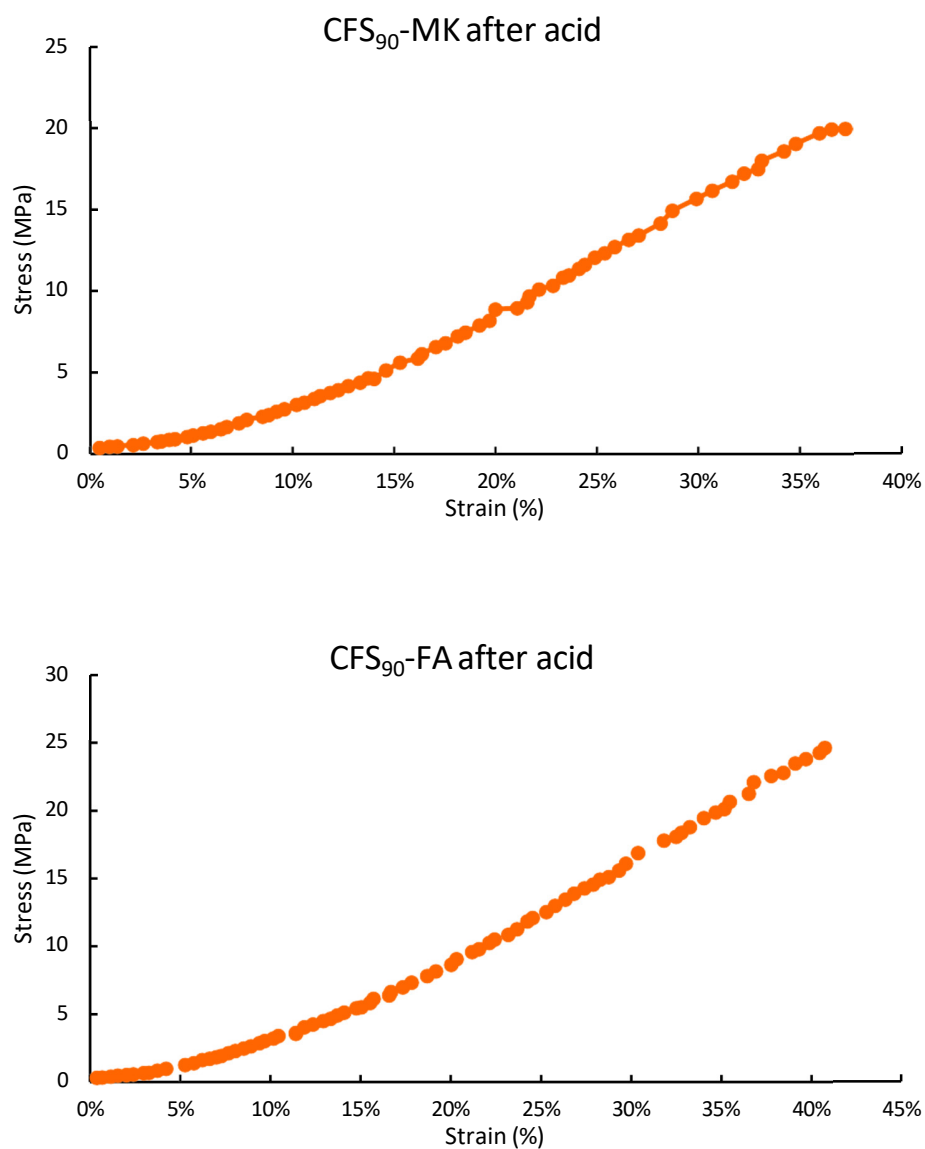

**Figure S4.** Stress-strain plots for measurements on the compression test cylinders for **CFS<sub>90</sub>-MK** and **CFS<sub>90</sub>-FA** after being submerged in 0.5 M H<sub>2</sub>SO<sub>4</sub> for 24 h. Data in Table 1 are averages of three independent trials with errors reported as standard deviations.

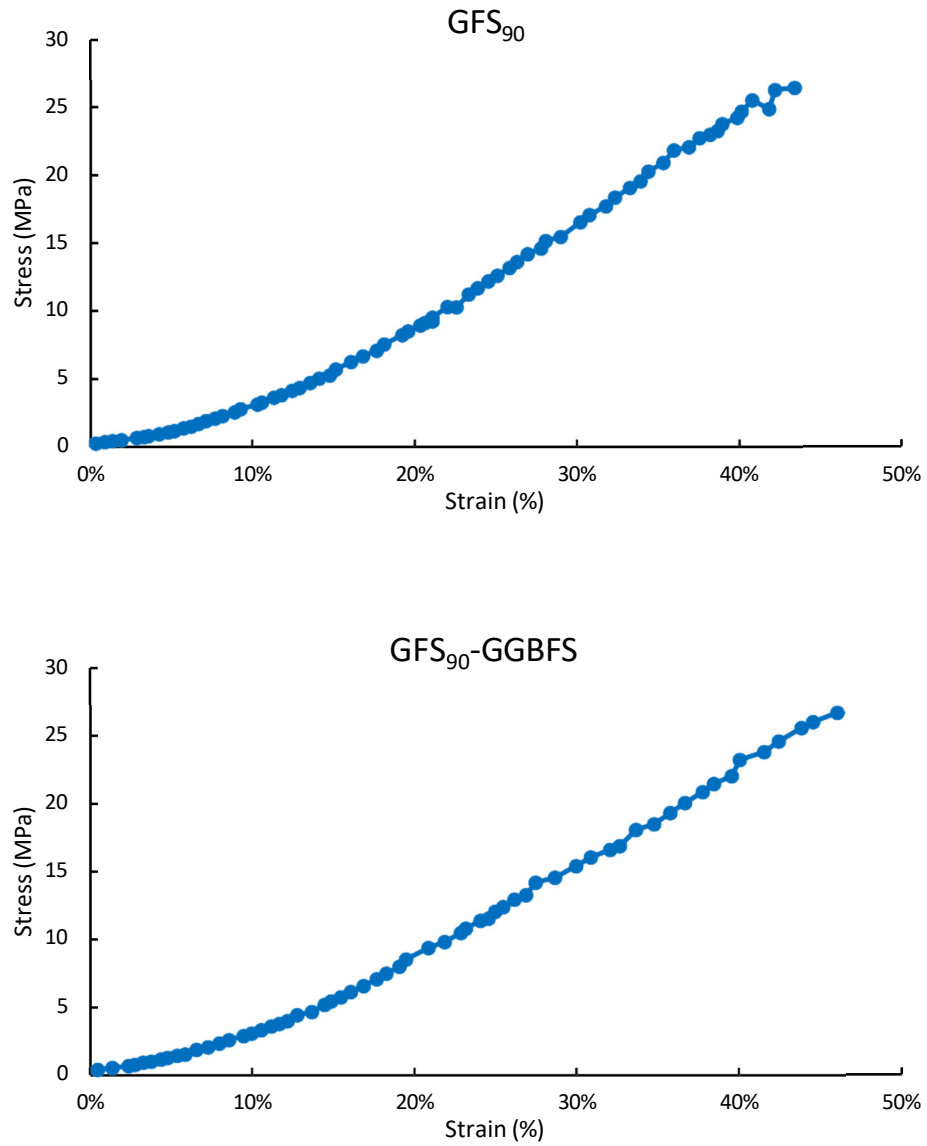

**Figure S5.** Stress-strain plots for measurements on the compression test cylinders for **GFS<sub>90</sub>** and **GFS<sub>90</sub>-GGBFS**. Data in Table 1 are averages of three independent trials with errors reported as standard deviations.

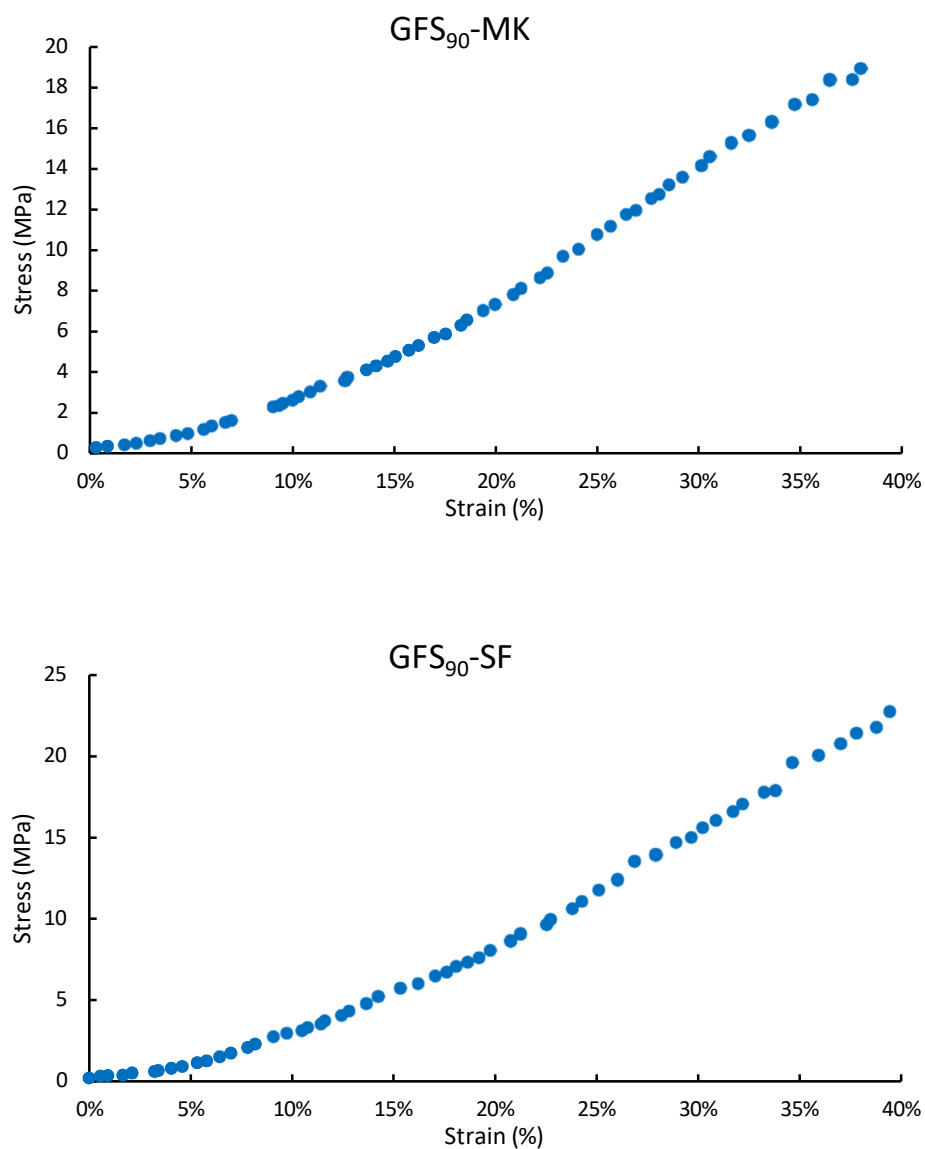

**Figure S6.** Stress-strain plots for measurements on the compression test cylinders for **GFS<sub>90</sub>-MK** and **GFS<sub>90</sub>-SF**. Data in Table 1 are averages of three independent trials with errors reported as standard deviations.

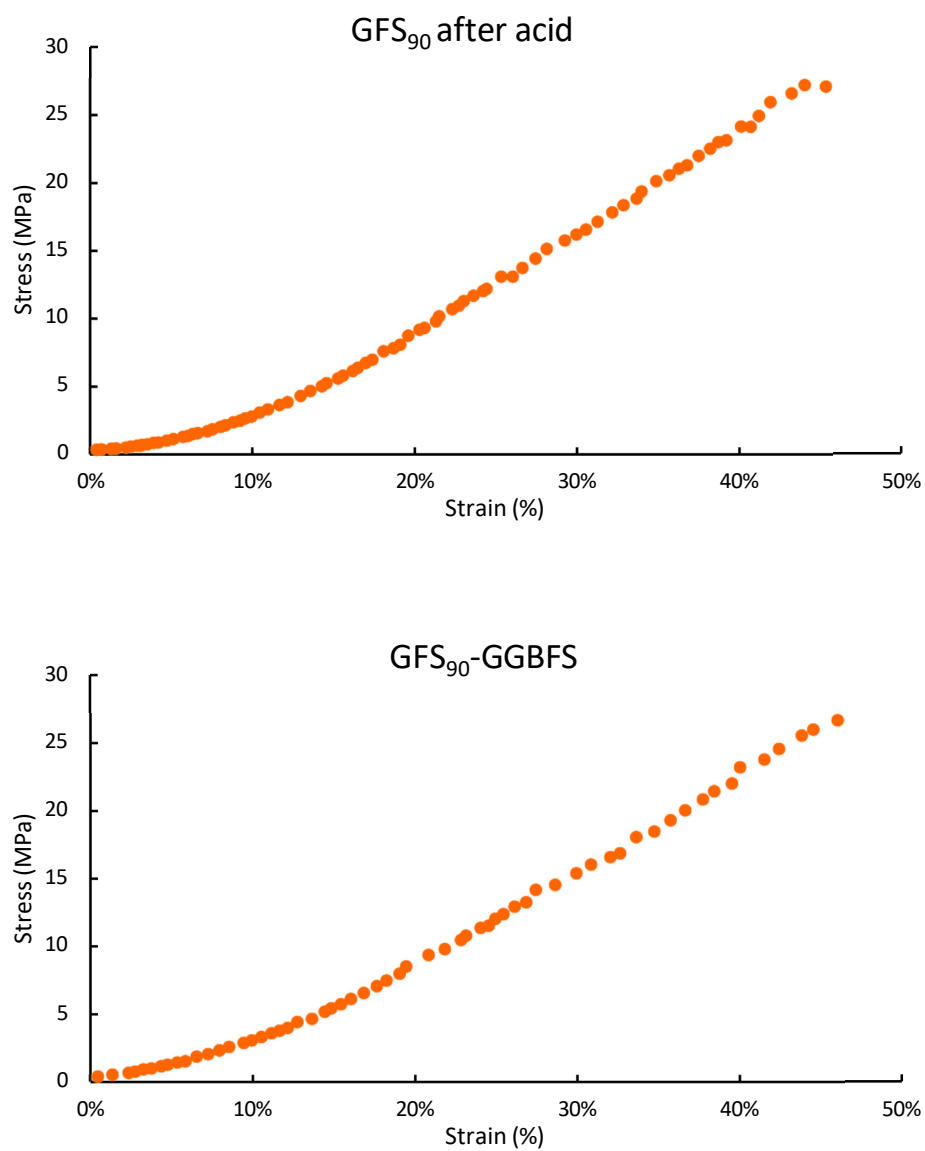

**Figure S7.** Stress-strain plots for measurements on the compression test cylinders for **GFS<sub>90</sub>** and **GFS<sub>90</sub>-GGBFS** after being submerged in 0.5 M H<sub>2</sub>SO<sub>4</sub> for 24 h. Data in Table 1 are averages of three independent trials with errors reported as standard deviations.



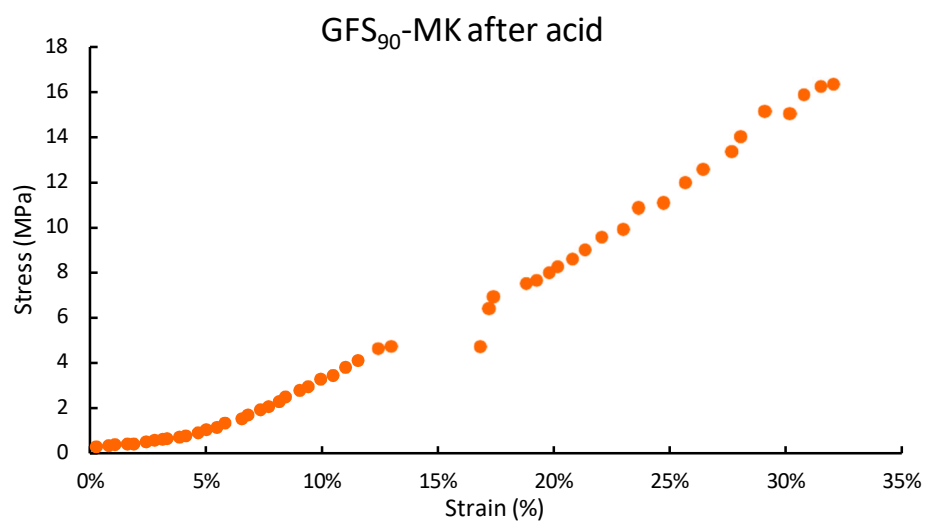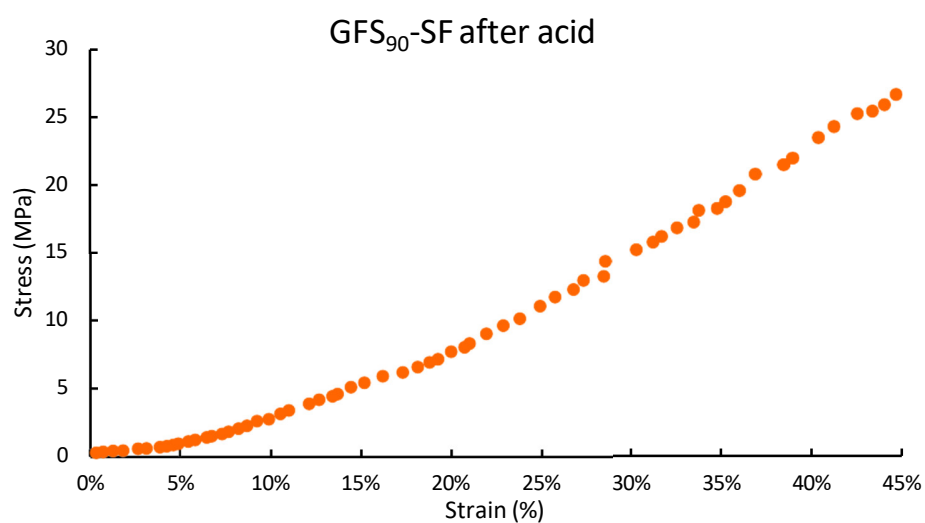

**Figure S8.** Stress-strain plots for measurements on the compression test cylinders for **GFS<sub>90</sub>-MK** and **GFS<sub>90</sub>-SF** after being submerged in 0.5 M H<sub>2</sub>SO<sub>4</sub> for 24 h. Data in Table 1 are averages of three independent trials with errors reported as standard deviations.
